# Supplementary material for: Efficient biodegradation of common ionic liquids by Sphingomonas paucimobilis bacterium
Source: Royal Society of Chemistry journal article supplement (doi:10.1039/c0gc00766h), 2011-01-01
Supplement: c0gc00766h.pdf [file c0gc00766h.pdf]

## Efficient biodegradation of common ionic liquids by *Sphingomonas paucimobilis* bacterium

Concepcion Abrusci,<sup>a</sup> Jose Palomar\*,<sup>b</sup> Jesus L. Pablos,<sup>c</sup> Francisco Rodriguez<sup>d</sup> and Fernando Catalina<sup>c</sup>

| Nomenclature                                            | Ionic liquid                                                    |
|---------------------------------------------------------|-----------------------------------------------------------------|
| (1) Bmin CH <sub>3</sub> CO <sub>2</sub>                | 1-Butyl-3-methylimidazolium acetate                             |
| (2) Dcmim Cl                                            | 1-Decyl-3-Methyl-Imidazolium chloride                           |
| (3) 1Bu3MePyNTf <sub>2</sub>                            | 1-Butyl-3-methylpyridinium bis(trifluoromethylsulfonyl)amide    |
| (4) Bmim CF <sub>3</sub> CO <sub>2</sub>                | 1-Butyl-3-methylimidazolium trifluoroacetate                    |
| (5) 1Bu4MePy NTf <sub>2</sub>                           | 1-Butyl-4-methylpyridinium bis(trifluoromethylsulfonyl)amide    |
| (6) OmimCl                                              | 1-Methyl-3-octylimidazolium chloride                            |
| (7) OmimBF <sub>4</sub>                                 | 1-Methyl-3-octylimidazolium tetrafluoroborate                   |
| (8) BminCF <sub>3</sub> SO <sub>3</sub>                 | 1-Butyl-3-methylimidazolium trifluoromethane sulfonate          |
| (9) 1Bu3MePyBF <sub>4</sub>                             | 1-Butyl-4-methylpyridinium tetrafluoroborate                    |
| (10) HxmimCl                                            | 1-Hexil-3-methylimidazolium chloride                            |
| (11) BmimCl                                             | 1-Butyl-3-methylimidazolium chloride                            |
| (12) HxmimBF <sub>4</sub>                               | 1-Hexyl-3-methylimidazolium tetrafluoroborate                   |
| (13) PBu <sub>4</sub> BF <sub>4</sub>                   | Tetrabutylphosphonium tetrafluoroborate                         |
| (14) BmimBF <sub>4</sub>                                | 1-Butyl-3-methylimidazolium tetrafluoroborate                   |
| (15) 1Bu1MePyrBF <sub>4</sub>                           | 1-Butyl-1-methylpyrrolidinium tetrafluoroborate                 |
| (16) EmimCl                                             | 1-Ethyl-3-methylimidazolium chloride                            |
| (17) OmimPF <sub>6</sub>                                | 1-Methyl-3-octylimidazolium hexafluorophosphate                 |
| (18) 1HxPyPF <sub>6</sub>                               | 1-Hexylpyridinium hexafluorophosphate                           |
| (19) NBu4NTf <sub>2</sub>                               | Tetrabutylammonium bis(trifluoromethylsulfonyl)amide            |
| (20) BmimPF <sub>6</sub>                                | 1-Butyl-3-methylimidazolium hexafluorophosphate                 |
| (21) PBu4PF <sub>6</sub>                                | Tetrabutylphosphonium hexafluorophosphate                       |
| (22) EmimNTf <sub>2</sub>                               | 1-Ethyl-3-methylimidazolium bis(trifluoromethylsulfonyl)amide   |
| (23) HxmimPF <sub>6</sub>                               | 1-Hexyl-3-methylimidazolium hexafluorophosphate                 |
| (24) HxmimNTf <sub>2</sub>                              | 1-Hexyl-3-methyl-Imidazolium bis(trifluoromethanesulfonyl)imide |
| (25) BmimBr                                             | 1-Butyl-3-methylimidazolium bromine                             |
| (26) BmimCH <sub>3</sub> SO <sub>3</sub>                | 1-Butyl-3-methylimidazolium methylsulfonate                     |
| (27) BmimDCN                                            | 1-Butyl-3-methylimidazolium dicyanamide                         |
| (28) 1Bu4MePyPF <sub>6</sub>                            | 1-Butyl-4-methylpyridinium hexafluorophosphate                  |
| (29) 1BuPyPF <sub>6</sub>                               | 1-Butylpyridinium hexafluorophosphate                           |
| (30) 1BuPyNTf <sub>2</sub>                              | 1-Butylpyridinium bis(trifluoromethylsulfonyl)amide             |
| (31) EmimPF <sub>6</sub>                                | 1-Ethyl-3-methylimidazolium hexafluorophosphate                 |
| (32) BmimNTf <sub>2</sub>                               | 1-Butyl-3-methyl-Imidazolium bis(trifluoromethanesulfonyl)imide |
| (33) 1EtPyPF <sub>6</sub>                               | 1-Ethylpyridinium hexafluorophosphate                           |
| (34) BmimC <sub>8</sub> H <sub>17</sub> SO <sub>4</sub> | 1-Butyl-3-methylimidazolium octylsulfate                        |
| (35) 1Et4MePyNTf <sub>2</sub>                           | 1-Ethyl-4-methylpyridinium bis(trifluoromethylsulfonyl)amide    |
| (36) 1Et3MePyNTf <sub>2</sub>                           | 1-Ethyl-3-methylpyridinium bis(trifluoromethylsulfonyl)amide    |
| (37) 1Bu1MePyrNTf <sub>2</sub>                          | 1-Butyl-1-methylpyrrolidinium bis(trifluoromethylsulfonyl)imide |

### Supplementary Information

Table S1. Nomenclature of ionic liquids.
